# Supplementary material for: Distribution, Sources, and Risk Assessment of Organochlorine Pesticides in Water from Beiluo River, Loess Plateau, China
Source: MDPI journal article supplement (doi:10.3390/toxics11060496), 2023-05-31
Supplement: s1 [file s1]

Supplementary data

# Distribution, Sources, and Risk Assessment of Organochlorine Pesticides in Water from Beiluo River, Loess Plateau, China

Jipu Guo <sup>1</sup>, Wenwu Chen <sup>2</sup>, Menglei Wu <sup>3</sup>, Chengkai Qu <sup>4</sup>, Haotian Sun <sup>2</sup> and Jiahua Guo <sup>2,\*</sup>

**Table S1.** Parameters of health risk assessment model.

| Parameter  | Description                     | Unit            | Value                                            |
|------------|---------------------------------|-----------------|--------------------------------------------------|
| <i>IR</i>  | Daily intake of water           | L/d             | 2                                                |
| <i>EF</i>  | Exposure frequency              | d/a             | 365                                              |
| <i>ED</i>  | Exposure duration               | a               | 30                                               |
| <i>BW</i>  | Average body weight             | kg              | 60                                               |
| <i>AT</i>  | Average exposure time           | d               | Non-carcinogenic<br>ED*365<br>Carcinogenic 25550 |
| <i>k</i>   | Dermal permeability coefficient | cm/h            | 0.001                                            |
| <i>SA</i>  | Exposed skin area               | cm <sup>2</sup> | 16600                                            |
| <i>FE</i>  | Body bath frequency             | n/d             | 0.3                                              |
| <i>f</i>   | Intestinal absorption ratio     | Unitless        | 1                                                |
| <i>τ</i>   | Delay time                      | h               | 1                                                |
| <i>TE</i>  | Dermal contact time             | h               | 0.4                                              |
| <i>SF</i>  | Cancer slope factor             | (kg·d)/mg       | Chemical-specific                                |
| <i>RfD</i> | Reference dose                  | mg/(kg·d)       | Chemical-specific                                |

**Table S2.** Distribution of OCPs in water of the Beiluo River (ng L<sup>-1</sup>).

| Substance                   | B1                    | B2                    | B3                    | B4                    | B5                    | B6                    | B7                    | B8                    | B9                    |
|-----------------------------|-----------------------|-----------------------|-----------------------|-----------------------|-----------------------|-----------------------|-----------------------|-----------------------|-----------------------|
| α-HCH                       | 6.28×10 <sup>-2</sup> | 3.03×10 <sup>-2</sup> | 1.91×10 <sup>-1</sup> | 3.65×10 <sup>-2</sup> | 3.35×10 <sup>-2</sup> | 1.13×10 <sup>-1</sup> | 1.18×10 <sup>-1</sup> | 1.07×10 <sup>-1</sup> | 1.55×10 <sup>-1</sup> |
| β-HCH                       | 1.33×10 <sup>-1</sup> | 3.16×10 <sup>-2</sup> | 1.26×10 <sup>-1</sup> | 7.29×10 <sup>-2</sup> | 6.38×10 <sup>-2</sup> | 2.00×10 <sup>-1</sup> | 2.76×10 <sup>-1</sup> | 1.39×10 <sup>-1</sup> | 8.42×10 <sup>-2</sup> |
| γ-HCH                       | 2.23×10 <sup>-2</sup> | 1.51×10 <sup>-2</sup> | 8.21×10 <sup>-2</sup> | 2.10×10 <sup>-2</sup> | 1.90×10 <sup>-2</sup> | 4.81×10 <sup>-2</sup> | 6.45×10 <sup>-2</sup> | 5.02×10 <sup>-2</sup> | 7.38×10 <sup>-2</sup> |
| δ-HCH                       | 6.08×10 <sup>-2</sup> | 1.35×10 <sup>-2</sup> | 2.77×10 <sup>-2</sup> | 5.27×10 <sup>-2</sup> | 9.06×10 <sup>-3</sup> | 3.34×10 <sup>-2</sup> | 3.89×10 <sup>-2</sup> | 1.17×10 <sup>-1</sup> | 2.06×10 <sup>-2</sup> |
| o,p'-DDD                    | 1.25×10 <sup>-2</sup> | 5.88×10 <sup>-3</sup> | 7.10×10 <sup>-3</sup> | 2.66×10 <sup>-2</sup> | 1.61×10 <sup>-3</sup> | 4.37×10 <sup>-3</sup> | 5.82×10 <sup>-3</sup> | 8.75×10 <sup>-3</sup> | 9.13×10 <sup>-2</sup> |
| p,p'-DDD                    | 6.38×10 <sup>-3</sup> | 9.98×10 <sup>-3</sup> | 5.09×10 <sup>-3</sup> | 1.27×10 <sup>-2</sup> | 4.72×10 <sup>-3</sup> | 4.99×10 <sup>-3</sup> | 4.05×10 <sup>-3</sup> | 2.19×10 <sup>-2</sup> | 1.12×10 <sup>-1</sup> |
| o,p'-DDT                    | 1.80×10 <sup>-2</sup> | 1.83×10 <sup>-2</sup> | 2.99×10 <sup>-2</sup> | 2.79×10 <sup>-2</sup> | 5.71×10 <sup>-3</sup> | 9.18×10 <sup>-3</sup> | 1.70×10 <sup>-2</sup> | 3.06×10 <sup>-2</sup> | 1.82×10 <sup>-2</sup> |
| p,p'-DDT                    | 2.75×10 <sup>-2</sup> | 2.29×10 <sup>-2</sup> | 1.23×10 <sup>-1</sup> | 3.29×10 <sup>-2</sup> | 2.80×10 <sup>-2</sup> | 1.09×10 <sup>-2</sup> | 3.18×10 <sup>-3</sup> | 3.85×10 <sup>-2</sup> | 1.43×10 <sup>-1</sup> |
| o,p'-DDE                    | 1.30×10 <sup>-3</sup> | 1.95×10 <sup>-3</sup> | 5.57×10 <sup>-3</sup> | 1.17×10 <sup>-3</sup> | 5.01×10 <sup>-4</sup> | 1.06×10 <sup>-3</sup> | 4.11×10 <sup>-3</sup> | 8.81×10 <sup>-3</sup> | 1.81×10 <sup>-2</sup> |
| p,p'-DDE                    | 7.52×10 <sup>-1</sup> | 8.69×10 <sup>-1</sup> | 6.55×10 <sup>-1</sup> | 1.13×10 <sup>0</sup>  | 4.57×10 <sup>-1</sup> | 5.05×10 <sup>-1</sup> | 6.24×10 <sup>-1</sup> | 2.04×10 <sup>0</sup>  | 4.10×10 <sup>0</sup>  |
| HCB                         | 2.24×10 <sup>0</sup>  | 1.06×10 <sup>0</sup>  | 3.00×10 <sup>0</sup>  | 2.12×10 <sup>0</sup>  | 1.46×10 <sup>0</sup>  | 7.16×10 <sup>-1</sup> | 1.48×10 <sup>-2</sup> | 1.20×10 <sup>0</sup>  | 3.81×10 <sup>0</sup>  |
| aldrin                      | 2.68×10 <sup>-2</sup> | 1.19×10 <sup>-1</sup> | 1.02×10 <sup>-1</sup> | 9.04×10 <sup>-2</sup> | 5.55×10 <sup>-2</sup> | 6.47×10 <sup>-2</sup> | 6.04×10 <sup>-2</sup> | 1.18×10 <sup>-1</sup> | 7.90×10 <sup>-2</sup> |
| dieldrin                    | 1.94×10 <sup>-2</sup> | 4.73×10 <sup>-2</sup> | 1.20×10 <sup>-1</sup> | 1.79×10 <sup>0</sup>  | 3.48×10 <sup>-2</sup> | 2.92×10 <sup>-2</sup> | 3.53×10 <sup>-1</sup> | 1.56×10 <sup>0</sup>  | 1.21×10 <sup>0</sup>  |
| endrin                      | 1.46×10 <sup>-1</sup> | 1.39×10 <sup>-1</sup> | 1.61×10 <sup>-1</sup> | 3.14×10 <sup>-1</sup> | 4.56×10 <sup>-2</sup> | 7.70×10 <sup>-2</sup> | 9.84×10 <sup>-2</sup> | 1.10×10 <sup>-1</sup> | 1.55×10 <sup>0</sup>  |
| endrin aldehyde             | 9.58×10 <sup>-2</sup> | 6.98×10 <sup>-2</sup> | 2.68×10 <sup>-1</sup> | 6.77×10 <sup>-2</sup> | 4.53×10 <sup>-3</sup> | 7.51×10 <sup>-2</sup> | 4.10×10 <sup>-3</sup> | 2.57×10 <sup>-1</sup> | 9.80×10 <sup>-2</sup> |
| endrin ketone               | 1.36×10 <sup>-1</sup> | 3.59×10 <sup>-2</sup> | 3.46×10 <sup>-2</sup> | 1.29×10 <sup>-1</sup> | 1.25×10 <sup>-2</sup> | 2.72×10 <sup>-2</sup> | 2.17×10 <sup>-1</sup> | 7.05×10 <sup>-1</sup> | 2.24×10 <sup>0</sup>  |
| endosulfan I                | 1.28×10 <sup>-1</sup> | 1.93×10 <sup>-1</sup> | 1.32×10 <sup>-1</sup> | 5.67×10 <sup>-1</sup> | 2.61×10 <sup>-2</sup> | 5.46×10 <sup>-2</sup> | 6.95×10 <sup>-1</sup> | 3.08×10 <sup>0</sup>  | 8.22×10 <sup>-1</sup> |
| endosulfan II               | 1.30×10 <sup>-1</sup> | 1.28×10 <sup>-1</sup> | 3.85×10 <sup>-1</sup> | 3.19×10 <sup>-1</sup> | 1.60×10 <sup>-1</sup> | 9.56×10 <sup>-2</sup> | 3.58×10 <sup>-1</sup> | 1.10×10 <sup>0</sup>  | 2.02×10 <sup>0</sup>  |
| endosulfan sulfate          | 1.30×10 <sup>-2</sup> | 5.02×10 <sup>-3</sup> | 3.15×10 <sup>-2</sup> | 2.93×10 <sup>-2</sup> | 5.76×10 <sup>-3</sup> | 2.99×10 <sup>-3</sup> | 2.58×10 <sup>-2</sup> | 8.73×10 <sup>-2</sup> | 5.01×10 <sup>-1</sup> |
| cis-Chlordane               | 3.82×10 <sup>-2</sup> | 4.03×10 <sup>-3</sup> | 1.10×10 <sup>-2</sup> | 1.77×10 <sup>-2</sup> | 4.88×10 <sup>-3</sup> | 2.43×10 <sup>-2</sup> | 1.78×10 <sup>-2</sup> | 5.11×10 <sup>-2</sup> | 3.36×10 <sup>-1</sup> |
| trans-Chlordane             | 2.31×10 <sup>-3</sup> | 8.31×10 <sup>-3</sup> | 7.34×10 <sup>-2</sup> | 2.03×10 <sup>-2</sup> | 1.17×10 <sup>-2</sup> | 1.26×10 <sup>-2</sup> | 1.33×10 <sup>-2</sup> | 5.64×10 <sup>-2</sup> | 3.07×10 <sup>-2</sup> |
| heptachlor                  | 1.12×10 <sup>-2</sup> | 6.33×10 <sup>-3</sup> | 1.40×10 <sup>-2</sup> | 1.11×10 <sup>-2</sup> | 6.52×10 <sup>-4</sup> | 8.96×10 <sup>-3</sup> | 1.57×10 <sup>-2</sup> | 5.59×10 <sup>-2</sup> | 2.38×10 <sup>-2</sup> |
| heptachlor epoxide isomer B | 5.85×10 <sup>-2</sup> | 7.40×10 <sup>-3</sup> | 1.16×10 <sup>-1</sup> | 2.05×10 <sup>-2</sup> | 3.35×10 <sup>-3</sup> | 5.96×10 <sup>-3</sup> | 9.92×10 <sup>-3</sup> | 3.26×10 <sup>-2</sup> | 1.09×10 <sup>-1</sup> |

|              |                       |                       |                       |                       |                       |                       |                       |                       |                       |
|--------------|-----------------------|-----------------------|-----------------------|-----------------------|-----------------------|-----------------------|-----------------------|-----------------------|-----------------------|
| methoxychlor | $1.49 \times 10^{-2}$ | $1.75 \times 10^{-2}$ | $1.39 \times 10^{-2}$ | $3.55 \times 10^{-2}$ | $7.17 \times 10^{-3}$ | $1.32 \times 10^{-2}$ | $3.55 \times 10^{-2}$ | $2.91 \times 10^{-2}$ | $1.68 \times 10^{-1}$ |
| mirex        | $4.84 \times 10^{-3}$ | $2.69 \times 10^{-3}$ | $6.29 \times 10^{-3}$ | $2.28 \times 10^{-3}$ | $1.42 \times 10^{-3}$ | $1.83 \times 10^{-3}$ | $7.55 \times 10^{-4}$ | $8.10 \times 10^{-2}$ | $2.26 \times 10^{-2}$ |

| Substance                   | B10                   | B11                   | B12                   | B13                   | B14                   | B15                   | B16                   | B17                   |
|-----------------------------|-----------------------|-----------------------|-----------------------|-----------------------|-----------------------|-----------------------|-----------------------|-----------------------|
| $\alpha$ -HCH               | $4.74 \times 10^{-2}$ | $1.08 \times 10^{-1}$ | $1.89 \times 10^{-1}$ | $1.13 \times 10^{-1}$ | $4.92 \times 10^{-2}$ | $1.44 \times 10^{-1}$ | $1.18 \times 10^{-1}$ | $1.64 \times 10^{-1}$ |
| $\beta$ -HCH                | $9.76 \times 10^{-2}$ | $2.53 \times 10^{-1}$ | $4.50 \times 10^{-2}$ | $2.09 \times 10^{-1}$ | $6.35 \times 10^{-2}$ | $2.18 \times 10^{-1}$ | $1.23 \times 10^{-1}$ | $1.64 \times 10^{-1}$ |
| $\gamma$ -HCH               | $4.14 \times 10^{-2}$ | $8.55 \times 10^{-2}$ | $3.03 \times 10^{-1}$ | $4.86 \times 10^{-2}$ | $1.43 \times 10^{-2}$ | $7.73 \times 10^{-2}$ | $3.64 \times 10^{-2}$ | $5.14 \times 10^{-2}$ |
| $\delta$ -HCH               | $9.54 \times 10^{-2}$ | $3.84 \times 10^{-2}$ | $7.66 \times 10^{-2}$ | $2.75 \times 10^{-2}$ | $1.64 \times 10^{-2}$ | $3.37 \times 10^{-2}$ | $2.64 \times 10^{-2}$ | $3.40 \times 10^{-2}$ |
| o,p'-DDD                    | $1.46 \times 10^{-2}$ | $7.64 \times 10^{-3}$ | $3.66 \times 10^{-1}$ | $2.03 \times 10^{-3}$ | $2.21 \times 10^{-3}$ | $3.36 \times 10^{-3}$ | $1.32 \times 10^{-2}$ | $4.47 \times 10^{-2}$ |
| p,p'-DDD                    | $6.70 \times 10^{-3}$ | $8.51 \times 10^{-3}$ | $3.30 \times 10^{-2}$ | $8.58 \times 10^{-3}$ | $2.44 \times 10^{-2}$ | $2.42 \times 10^{-2}$ | $1.71 \times 10^{-2}$ | $1.33 \times 10^{-2}$ |
| o,p'-DDT                    | $1.14 \times 10^{-2}$ | $9.07 \times 10^{-3}$ | $3.73 \times 10^{-2}$ | $1.31 \times 10^{-2}$ | $2.06 \times 10^{-2}$ | $9.13 \times 10^{-3}$ | $2.57 \times 10^{-2}$ | $1.45 \times 10^{-2}$ |
| p,p'-DDT                    | $3.59 \times 10^{-2}$ | $1.11 \times 10^{-2}$ | $2.93 \times 10^{-1}$ | $2.20 \times 10^{-2}$ | $3.74 \times 10^{-2}$ | $2.91 \times 10^{-2}$ | $5.46 \times 10^{-2}$ | $2.23 \times 10^{-2}$ |
| o,p'-DDE                    | $3.18 \times 10^{-4}$ | $7.74 \times 10^{-4}$ | $7.66 \times 10^{-3}$ | $1.42 \times 10^{-3}$ | $4.85 \times 10^{-3}$ | $1.63 \times 10^{-3}$ | $1.02 \times 10^{-2}$ | $4.76 \times 10^{-3}$ |
| p,p'-DDE                    | $1.81 \times 10^0$    | $7.56 \times 10^{-1}$ | $7.32 \times 10^{-1}$ | $8.30 \times 10^{-1}$ | $1.47 \times 10^0$    | $6.28 \times 10^{-1}$ | $2.57 \times 10^0$    | $1.56 \times 10^0$    |
| HCB                         | $1.77 \times 10^0$    | $2.18 \times 10^{-1}$ | $1.48 \times 10^{-2}$ | $1.48 \times 10^{-2}$ | $3.67 \times 10^0$    | $2.59 \times 10^{-2}$ | $3.14 \times 10^0$    | $3.23 \times 10^0$    |
| aldrin                      | $8.30 \times 10^{-2}$ | $4.23 \times 10^{-2}$ | $1.42 \times 10^{-1}$ | $3.24 \times 10^{-2}$ | $1.74 \times 10^{-1}$ | $9.89 \times 10^{-2}$ | $2.21 \times 10^{-1}$ | $2.13 \times 10^{-1}$ |
| dieldrin                    | $2.23 \times 10^{-1}$ | $2.67 \times 10^{-2}$ | $2.01 \times 10^1$    | $3.31 \times 10^{-2}$ | $3.22 \times 10^{-1}$ | $9.28 \times 10^{-2}$ | $3.41 \times 10^{-1}$ | $6.25 \times 10^{-1}$ |
| endrin                      | $1.52 \times 10^{-1}$ | $3.63 \times 10^{-2}$ | $3.01 \times 10^{-1}$ | $1.43 \times 10^{-1}$ | $2.52 \times 10^{-1}$ | $9.51 \times 10^{-2}$ | $5.23 \times 10^{-1}$ | $7.89 \times 10^{-1}$ |
| endrin aldehyde             | $3.58 \times 10^{-1}$ | $6.36 \times 10^{-2}$ | $7.83 \times 10^{-2}$ | $2.74 \times 10^{-2}$ | $9.82 \times 10^{-2}$ | $9.39 \times 10^{-2}$ | $3.11 \times 10^{-1}$ | $2.14 \times 10^{-1}$ |
| endrin ketone               | $3.77 \times 10^{-2}$ | $9.04 \times 10^{-2}$ | $3.07 \times 10^{-1}$ | $6.09 \times 10^{-2}$ | $4.47 \times 10^{-1}$ | $6.38 \times 10^{-2}$ | $1.48 \times 10^{-1}$ | $6.39 \times 10^{-1}$ |
| endosulfan I                | $4.94 \times 10^{-1}$ | $2.64 \times 10^{-1}$ | $6.78 \times 10^0$    | $4.16 \times 10^{-2}$ | $2.12 \times 10^{-1}$ | $5.19 \times 10^{-2}$ | $1.56 \times 10^{-1}$ | $1.25 \times 10^{-1}$ |
| endosulfan II               | $3.65 \times 10^{-1}$ | $4.75 \times 10^{-2}$ | $2.29 \times 10^0$    | $4.93 \times 10^{-2}$ | $2.76 \times 10^{-2}$ | $1.34 \times 10^{-2}$ | $4.51 \times 10^{-2}$ | $6.46 \times 10^{-2}$ |
| endosulfan sulfate          | $1.33 \times 10^{-2}$ | $1.27 \times 10^{-2}$ | $1.79 \times 10^{-1}$ | $5.98 \times 10^{-2}$ | $2.29 \times 10^{-1}$ | $1.48 \times 10^{-3}$ | $6.21 \times 10^{-2}$ | $2.10 \times 10^{-2}$ |
| cis-Chlordane               | $7.67 \times 10^{-2}$ | $4.92 \times 10^{-3}$ | $1.59 \times 10^{-1}$ | $1.00 \times 10^{-3}$ | $1.38 \times 10^{-3}$ | $1.18 \times 10^{-2}$ | $8.45 \times 10^{-2}$ | $7.80 \times 10^{-2}$ |
| trans-Chlordane             | $3.53 \times 10^{-2}$ | $3.31 \times 10^{-2}$ | $9.92 \times 10^{-3}$ | $6.01 \times 10^{-3}$ | $2.93 \times 10^{-2}$ | $9.11 \times 10^{-3}$ | $1.69 \times 10^{-1}$ | $7.79 \times 10^{-1}$ |
| heptachlor                  | $1.49 \times 10^{-2}$ | $4.37 \times 10^{-3}$ | $1.10 \times 10^{-1}$ | $4.91 \times 10^{-3}$ | $1.27 \times 10^{-2}$ | $1.28 \times 10^{-2}$ | $1.48 \times 10^{-2}$ | $3.70 \times 10^{-2}$ |
| heptachlor epoxide isomer B | $4.39 \times 10^{-2}$ | $2.07 \times 10^{-2}$ | $2.67 \times 10^{-3}$ | $5.11 \times 10^{-3}$ | $2.91 \times 10^{-3}$ | $1.12 \times 10^{-2}$ | $8.59 \times 10^{-3}$ | $6.51 \times 10^{-3}$ |
| methoxychlor                | $2.43 \times 10^{-2}$ | $1.68 \times 10^{-2}$ | $1.76 \times 10^{-2}$ | $1.10 \times 10^{-2}$ | $1.02 \times 10^{-1}$ | $5.72 \times 10^{-3}$ | $1.74 \times 10^{-2}$ | $2.42 \times 10^{-2}$ |
| mirex                       | $9.67 \times 10^{-3}$ | $8.55 \times 10^{-4}$ | $1.01 \times 10^{-2}$ | $1.24 \times 10^{-3}$ | $2.15 \times 10^{-3}$ | $2.30 \times 10^{-3}$ | $4.11 \times 10^{-3}$ | $5.68 \times 10^{-3}$ |

**Table S3.** Descriptive statistics of OCPs concentrations in water of the Beiluo River (ng L<sup>-1</sup>).

| Substance     | MDLs (ng L <sup>-1</sup> ) | Mean (ng L <sup>-1</sup> ) | Range (ng L <sup>-1</sup> ) | SD (ng L <sup>-1</sup> ) | CV          |
|---------------|----------------------------|----------------------------|-----------------------------|--------------------------|-------------|
| $\alpha$ -HCH | 0.0086                     | 0.10                       | 0.030-0.19                  | 0.054                    | 0.51        |
| $\beta$ -HCH  | 0.015                      | 0.14                       | 0.032-0.28                  | 0.074                    | 0.55        |
| $\gamma$ -HCH | 0.020                      | 0.062                      | 0.014-0.30                  | 0.067                    | 1.073       |
| $\delta$ -HCH | 0.12                       | 0.042                      | 0.0091-0.12                 | 0.030                    | 0.70        |
| <b>HCHs</b>   |                            | <b>0.34</b>                | <b>0.090-0.61</b>           | <b>0.15</b>              | <b>0.42</b> |
| o,p'-DDD      | 0.0083                     | 0.034                      | 0.0016-0.37                 | 0.088                    | 2.59        |
| p,p'-DDD      | 0.011                      | 0.019                      | 0.0041-0.11                 | 0.026                    | 1.37        |
| o,p'-DDT      | 0.041                      | 0.019                      | 0.0057-0.037                | 0.0090                   | 0.49        |
| p,p'-DDT      | 0.017                      | 0.055                      | 0.0032-0.29                 | 0.072                    | 1.30        |
| o,p'-DDE      | 0.0072                     | 0.0044                     | 0.00032-0.018               | 0.0047                   | 1.075       |
| p,p'-DDE      | 0.56                       | 1.26                       | 0.46-4.1                    | 0.95                     | 0.75        |
| <b>DDTs</b>   |                            | <b>1.39</b>                | <b>0.50-4.48</b>            | <b>1.0060</b>            | <b>0.72</b> |
| <b>HCB</b>    | 0.030                      | <b>1.63</b>                | <b>0.015-3.81</b>           | <b>1.37</b>              | <b>0.84</b> |
| aldrin        | 0.022                      | 0.10                       | 0.027-0.22                  | 0.058                    | 0.57        |
| dieldrin      | 0.11                       | 1.55                       | 0.019-20.08                 | 4.81                     | 3.10        |

|                             |        |              |                    |              |              |
|-----------------------------|--------|--------------|--------------------|--------------|--------------|
| endrin                      | 0.13   | 0.25         | 0.036-1.55         | 0.36         | 1.44         |
| endrin aldehyde             | 0.010  | 0.13         | 0.0041-0.36        | 0.11         | 0.85         |
| endrin ketone               | 0.38   | 0.28         | 0.012-2.24         | 0.54         | 1.92         |
| <b>DRINs</b>                |        | <b>2.31</b>  | <b>0.15-20.91</b>  | <b>4.96</b>  | <b>2.15</b>  |
| endosulfan I                | 0.36   | 0.81         | 0.026-6.78         | 1.70         | 2.090        |
| endosulfan II               | 0.037  | 0.48         | 0.013-2.29         | 0.69         | 1.43         |
| endosulfan sulfate          | 0.11   | 0.075        | 0.0015-0.5         | 0.13         | 1.69         |
| <b>SULPHs</b>               |        | <b>1.37</b>  | <b>0.067-9.25</b>  | <b>2.34</b>  | <b>1.71</b>  |
| cis-Chlordane               | 0.031  | 0.054        | 0.0010-0.34        | 0.084        | 1.55         |
| trans-Chlordane             | 0.032  | 0.035        | 0.0023-0.17        | 0.041        | 1.18         |
| heptachlor                  | 0.019  | 0.019        | 0.00065-0.11       | 0.026        | 1.38         |
| heptachlor epoxide isomer B | 0.022  | 0.031        | 0.0027-0.12        | 0.036        | 1.18         |
| <b>CHLs</b>                 |        | <b>0.14</b>  | <b>0.017-0.50</b>  | <b>0.13</b>  | <b>0.93</b>  |
| methoxychlor                | 0.20   | 0.033        | 0.0057-0.17        | 0.041        | 1.26         |
| mirex                       | 0.0043 | 0.0094       | 0.00075-0.081      | 0.019        | 2.044        |
| <b>Others</b>               |        | <b>0.042</b> | <b>0.0080-0.19</b> | <b>0.048</b> | <b>1.15</b>  |
| <b>EOCPs</b>                |        | <b>7.23</b>  | <b>1.76-32.57</b>  | <b>7.72</b>  | <b>1.069</b> |

Table S4. The ratio distribution of chlordane isomers in water of the Beiluo River

|                      | B1                    | B2                    | B3                    | B4                    | B5                    | B6                    | B7                    | B8                    | B9                    | B10                   | B11                   | B12                   | B13                   | B14                   | B15                   | B16                   | B17                   |
|----------------------|-----------------------|-----------------------|-----------------------|-----------------------|-----------------------|-----------------------|-----------------------|-----------------------|-----------------------|-----------------------|-----------------------|-----------------------|-----------------------|-----------------------|-----------------------|-----------------------|-----------------------|
| cis-chlordane (CC)   | $3.82 \times 10^{-2}$ | $4.03 \times 10^{-3}$ | $1.10 \times 10^{-2}$ | $1.77 \times 10^{-2}$ | $4.88 \times 10^{-3}$ | $2.43 \times 10^{-2}$ | $1.78 \times 10^{-2}$ | $5.11 \times 10^{-2}$ | $3.36 \times 10^{-1}$ | $7.67 \times 10^{-2}$ | $4.92 \times 10^{-3}$ | $1.59 \times 10^{-1}$ | $1.00 \times 10^{-3}$ | $1.38 \times 10^{-3}$ | $1.18 \times 10^{-2}$ | $8.45 \times 10^{-2}$ | $7.80 \times 10^{-2}$ |
| trans-chlordane (TC) | $2.31 \times 10^{-3}$ | $8.31 \times 10^{-3}$ | $7.34 \times 10^{-2}$ | $2.03 \times 10^{-2}$ | $1.17 \times 10^{-2}$ | $1.26 \times 10^{-2}$ | $1.33 \times 10^{-2}$ | $5.64 \times 10^{-2}$ | $3.07 \times 10^{-2}$ | $3.53 \times 10^{-2}$ | $3.31 \times 10^{-2}$ | $9.92 \times 10^{-3}$ | $6.01 \times 10^{-3}$ | $2.93 \times 10^{-2}$ | $9.11 \times 10^{-3}$ | $1.69 \times 10^{-1}$ | $7.79 \times 10^{-2}$ |
| CC/TC                | $1.65 \times 10^1$    | $4.85 \times 10^{-1}$ | $1.50 \times 10^{-1}$ | $8.74 \times 10^{-1}$ | $4.16 \times 10^{-1}$ | $1.93 \times 10^0$    | $1.34 \times 10^0$    | $9.07 \times 10^{-1}$ | $1.09 \times 10^1$    | $2.17 \times 10^0$    | $1.49 \times 10^{-1}$ | $1.60 \times 10^1$    | $1.67 \times 10^{-1}$ | $4.71 \times 10^{-2}$ | $1.29 \times 10^0$    | $4.99 \times 10^{-1}$ | $1.00 \times 10^0$    |

Table S5. The ecological risk of OCPs in water of the Beiluo River.

| Substance     | PNEC | B1                    | B2                    | B3                    | B4                    | B5                    | B6                    | B7                    | B8                    | B9                    |
|---------------|------|-----------------------|-----------------------|-----------------------|-----------------------|-----------------------|-----------------------|-----------------------|-----------------------|-----------------------|
| $\alpha$ -HCH | 370  | $1.70 \times 10^{-4}$ | $8.18 \times 10^{-5}$ | $5.17 \times 10^{-4}$ | $9.88 \times 10^{-5}$ | $9.04 \times 10^{-5}$ | $3.05 \times 10^{-5}$ | $3.18 \times 10^{-5}$ | $2.88 \times 10^{-5}$ | $4.18 \times 10^{-5}$ |
| $\beta$ -HCH  | 3140 | $4.22 \times 10^{-5}$ | $1.01 \times 10^{-5}$ | $4.01 \times 10^{-5}$ | $2.32 \times 10^{-5}$ | $2.03 \times 10^{-5}$ | $6.37 \times 10^{-6}$ | $8.77 \times 10^{-6}$ | $4.43 \times 10^{-6}$ | $2.68 \times 10^{-6}$ |
| $\gamma$ -HCH | 2.9  | $7.69 \times 10^{-3}$ | $5.20 \times 10^{-3}$ | $2.83 \times 10^{-3}$ | $7.23 \times 10^{-3}$ | $6.55 \times 10^{-3}$ | $1.66 \times 10^{-3}$ | $2.22 \times 10^{-3}$ | $1.73 \times 10^{-3}$ | $2.55 \times 10^{-3}$ |
| $\delta$ -HCH | 1580 | $3.85 \times 10^{-5}$ | $8.54 \times 10^{-6}$ | $1.75 \times 10^{-5}$ | $3.33 \times 10^{-5}$ | $5.73 \times 10^{-5}$ | $2.12 \times 10^{-5}$ | $2.46 \times 10^{-5}$ | $7.40 \times 10^{-6}$ | $1.30 \times 10^{-5}$ |
| o,p'-DDD      | 37.9 | $3.30 \times 10^{-4}$ | $1.55 \times 10^{-4}$ | $1.87 \times 10^{-4}$ | $7.02 \times 10^{-4}$ | $4.24 \times 10^{-4}$ | $1.15 \times 10^{-4}$ | $1.54 \times 10^{-4}$ | $2.31 \times 10^{-4}$ | $2.41 \times 10^{-4}$ |
| p,p'-DDD      | 9    | $7.09 \times 10^{-4}$ | $1.11 \times 10^{-4}$ | $5.66 \times 10^{-4}$ | $1.42 \times 10^{-4}$ | $5.25 \times 10^{-4}$ | $5.55 \times 10^{-4}$ | $4.50 \times 10^{-4}$ | $2.43 \times 10^{-4}$ | $1.25 \times 10^{-4}$ |
| o,p'-DDT      | 30   | $6.01 \times 10^{-4}$ | $6.10 \times 10^{-4}$ | $9.96 \times 10^{-4}$ | $9.30 \times 10^{-4}$ | $1.90 \times 10^{-4}$ | $3.06 \times 10^{-4}$ | $5.68 \times 10^{-4}$ | $1.02 \times 10^{-4}$ | $6.06 \times 10^{-4}$ |
| p,p'-DDT      | 9    | $3.06 \times 10^{-4}$ | $2.54 \times 10^{-4}$ | $1.37 \times 10^{-4}$ | $3.65 \times 10^{-4}$ | $3.11 \times 10^{-4}$ | $1.22 \times 10^{-4}$ | $3.53 \times 10^{-4}$ | $4.28 \times 10^{-4}$ | $1.59 \times 10^{-4}$ |
| o,p'-DDE      | 15   | $8.64 \times 10^{-5}$ | $1.30 \times 10^{-5}$ | $3.71 \times 10^{-5}$ | $7.78 \times 10^{-5}$ | $3.34 \times 10^{-5}$ | $7.06 \times 10^{-5}$ | $2.74 \times 10^{-5}$ | $5.87 \times 10^{-5}$ | $1.21 \times 10^{-5}$ |
| p,p'-DDE      | 53.5 | $1.41 \times 10^{-4}$ | $1.62 \times 10^{-4}$ | $1.22 \times 10^{-4}$ | $2.12 \times 10^{-4}$ | $8.54 \times 10^{-4}$ | $9.45 \times 10^{-4}$ | $1.17 \times 10^{-4}$ | $3.81 \times 10^{-4}$ | $7.66 \times 10^{-4}$ |
| HCB           | 3    | $7.45 \times 10^{-1}$ | $3.54 \times 10^{-1}$ | $9.99 \times 10^{-1}$ | $7.07 \times 10^{-1}$ | $4.85 \times 10^{-1}$ | $2.39 \times 10^{-1}$ | $4.94 \times 10^{-1}$ | $4.00 \times 10^{-1}$ | $1.27 \times 10^0$    |
| aldrin        | 10   | $2.68 \times 10^{-3}$ | $1.19 \times 10^{-3}$ | $1.02 \times 10^{-3}$ | $9.04 \times 10^{-3}$ | $5.55 \times 10^{-3}$ | $6.47 \times 10^{-3}$ | $6.04 \times 10^{-3}$ | $1.18 \times 10^{-3}$ | $7.90 \times 10^{-3}$ |
| dieldrin      | 50   | $3.89 \times 10^{-4}$ | $9.47 \times 10^{-4}$ | $2.40 \times 10^{-3}$ | $3.58 \times 10^{-4}$ | $6.96 \times 10^{-4}$ | $5.84 \times 10^{-4}$ | $7.06 \times 10^{-4}$ | $3.12 \times 10^{-4}$ | $2.43 \times 10^{-4}$ |

|                             |      |                       |                       |                       |                       |                       |                       |                       |                       |                       |
|-----------------------------|------|-----------------------|-----------------------|-----------------------|-----------------------|-----------------------|-----------------------|-----------------------|-----------------------|-----------------------|
| endrin                      | 4.2  | $3.48 \times 10^{-2}$ | $3.30 \times 10^{-2}$ | $3.82 \times 10^{-2}$ | $7.47 \times 10^{-2}$ | $1.09 \times 10^{-2}$ | $1.83 \times 10^{-2}$ | $2.34 \times 10^{-2}$ | $2.63 \times 10^{-2}$ | $3.69 \times 10^{-1}$ |
| endrin aldehyde             | 42   | $2.28 \times 10^{-3}$ | $1.66 \times 10^{-3}$ | $6.38 \times 10^{-3}$ | $1.61 \times 10^{-3}$ | $1.08 \times 10^{-4}$ | $1.79 \times 10^{-3}$ | $9.75 \times 10^{-5}$ | $6.12 \times 10^{-3}$ | $2.33 \times 10^{-3}$ |
| endrin ketone               | 42   | $3.24 \times 10^{-3}$ | $8.55 \times 10^{-4}$ | $8.25 \times 10^{-3}$ | $3.06 \times 10^{-3}$ | $2.97 \times 10^{-4}$ | $6.47 \times 10^{-3}$ | $5.17 \times 10^{-4}$ | $1.68 \times 10^{-2}$ | $5.33 \times 10^{-2}$ |
| endosulfan I                | 2    | $6.41 \times 10^{-2}$ | $9.63 \times 10^{-2}$ | $6.60 \times 10^{-2}$ | $2.84 \times 10^{-1}$ | $1.30 \times 10^{-2}$ | $2.73 \times 10^{-2}$ | $3.48 \times 10^{-1}$ | $1.54 \times 10^0$    | $4.11 \times 10^{-1}$ |
| endosulfan II               | 4.9  | $2.65 \times 10^{-2}$ | $2.62 \times 10^{-2}$ | $7.87 \times 10^{-2}$ | $6.51 \times 10^{-2}$ | $3.27 \times 10^{-2}$ | $1.95 \times 10^{-2}$ | $7.31 \times 10^{-2}$ | $2.25 \times 10^{-1}$ | $4.12 \times 10^{-1}$ |
| endosulfan sulfate          | 20   | $6.51 \times 10^{-4}$ | $2.51 \times 10^{-4}$ | $1.57 \times 10^{-3}$ | $1.46 \times 10^{-3}$ | $2.88 \times 10^{-4}$ | $1.50 \times 10^{-3}$ | $1.29 \times 10^{-3}$ | $4.36 \times 10^{-3}$ | $2.50 \times 10^{-2}$ |
| cis-Chlordane               | 90   | $4.24 \times 10^{-4}$ | $4.48 \times 10^{-5}$ | $1.22 \times 10^{-3}$ | $1.97 \times 10^{-4}$ | $5.42 \times 10^{-5}$ | $2.69 \times 10^{-4}$ | $1.98 \times 10^{-4}$ | $5.68 \times 10^{-4}$ | $3.74 \times 10^{-3}$ |
| trans-Chlordane             | 12   | $1.92 \times 10^{-4}$ | $6.92 \times 10^{-4}$ | $6.12 \times 10^{-3}$ | $1.69 \times 10^{-3}$ | $9.78 \times 10^{-4}$ | $1.05 \times 10^{-3}$ | $1.11 \times 10^{-3}$ | $4.70 \times 10^{-3}$ | $2.56 \times 10^{-3}$ |
| heptachlor                  | 38.1 | $2.94 \times 10^{-4}$ | $1.66 \times 10^{-4}$ | $3.67 \times 10^{-4}$ | $2.90 \times 10^{-4}$ | $1.71 \times 10^{-5}$ | $2.35 \times 10^{-4}$ | $4.12 \times 10^{-4}$ | $1.47 \times 10^{-3}$ | $6.23 \times 10^{-4}$ |
| heptachlor epoxide isomer B | 84   | $6.96 \times 10^{-4}$ | $8.81 \times 10^{-5}$ | $1.38 \times 10^{-3}$ | $2.44 \times 10^{-4}$ | $3.99 \times 10^{-5}$ | $7.10 \times 10^{-5}$ | $1.18 \times 10^{-4}$ | $3.88 \times 10^{-4}$ | $1.30 \times 10^{-3}$ |
| methoxychlor                | 150  | $9.93 \times 10^{-5}$ | $1.17 \times 10^{-4}$ | $9.26 \times 10^{-5}$ | $2.37 \times 10^{-4}$ | $4.78 \times 10^{-5}$ | $8.83 \times 10^{-5}$ | $2.37 \times 10^{-4}$ | $1.94 \times 10^{-4}$ | $1.12 \times 10^{-3}$ |
| mirex                       | 1000 | $4.84 \times 10^{-6}$ | $2.69 \times 10^{-6}$ | $6.29 \times 10^{-6}$ | $2.28 \times 10^{-6}$ | $1.42 \times 10^{-6}$ | $1.83 \times 10^{-6}$ | $7.55 \times 10^{-7}$ | $8.10 \times 10^{-5}$ | $2.26 \times 10^{-5}$ |
| ΣOCPs                       |      | $9.08 \times 10^{-1}$ | $5.52 \times 10^{-1}$ | $1.27 \times 10^0$    | $1.22 \times 10^0$    | $5.69 \times 10^{-1}$ | $3.44 \times 10^{-1}$ | $5.07 \times 10^{-1}$ | $2.33 \times 10^0$    | $2.72 \times 10^0$    |
| Substance                   | PNEC | B10                   | B11                   | B12                   | B13                   | B14                   | B15                   | B16                   | B17                   |                       |
| α-HCH                       | 370  | $1.28 \times 10^{-4}$ | $2.91 \times 10^{-4}$ | $5.12 \times 10^{-4}$ | $3.05 \times 10^{-4}$ | $1.33 \times 10^{-4}$ | $3.89 \times 10^{-4}$ | $3.20 \times 10^{-4}$ | $4.44 \times 10^{-4}$ |                       |
| β-HCH                       | 3140 | $3.11 \times 10^{-5}$ | $8.05 \times 10^{-5}$ | $1.43 \times 10^{-5}$ | $6.66 \times 10^{-5}$ | $2.02 \times 10^{-5}$ | $6.93 \times 10^{-5}$ | $3.92 \times 10^{-5}$ | $5.21 \times 10^{-5}$ |                       |
| γ-HCH                       | 2.9  | $1.43 \times 10^{-2}$ | $2.95 \times 10^{-2}$ | $1.05 \times 10^{-1}$ | $1.68 \times 10^{-2}$ | $4.91 \times 10^{-3}$ | $2.66 \times 10^{-2}$ | $1.26 \times 10^{-2}$ | $1.77 \times 10^{-2}$ |                       |
| δ-HCH                       | 1580 | $6.04 \times 10^{-5}$ | $2.43 \times 10^{-5}$ | $4.85 \times 10^{-5}$ | $1.74 \times 10^{-5}$ | $1.04 \times 10^{-5}$ | $2.14 \times 10^{-5}$ | $1.67 \times 10^{-5}$ | $2.15 \times 10^{-5}$ |                       |
| o,p'-DDD                    | 37.9 | $3.85 \times 10^{-4}$ | $2.02 \times 10^{-4}$ | $9.65 \times 10^{-3}$ | $5.35 \times 10^{-5}$ | $5.84 \times 10^{-5}$ | $8.85 \times 10^{-5}$ | $3.49 \times 10^{-4}$ | $1.18 \times 10^{-4}$ |                       |
| p,p'-DDD                    | 9    | $7.44 \times 10^{-4}$ | $9.46 \times 10^{-4}$ | $3.67 \times 10^{-3}$ | $9.53 \times 10^{-4}$ | $2.72 \times 10^{-3}$ | $2.69 \times 10^{-3}$ | $1.90 \times 10^{-3}$ | $1.48 \times 10^{-3}$ |                       |
| o,p'-DDT                    | 30   | $3.81 \times 10^{-4}$ | $3.02 \times 10^{-4}$ | $1.24 \times 10^{-3}$ | $4.37 \times 10^{-4}$ | $6.86 \times 10^{-4}$ | $3.04 \times 10^{-4}$ | $8.56 \times 10^{-4}$ | $4.83 \times 10^{-4}$ |                       |
| p,p'-DDT                    | 9    | $3.99 \times 10^{-3}$ | $1.23 \times 10^{-3}$ | $3.26 \times 10^{-2}$ | $2.44 \times 10^{-3}$ | $4.16 \times 10^{-3}$ | $3.23 \times 10^{-3}$ | $6.07 \times 10^{-3}$ | $2.47 \times 10^{-3}$ |                       |
| o,p'-DDE                    | 15   | $2.12 \times 10^{-5}$ | $5.16 \times 10^{-5}$ | $5.11 \times 10^{-4}$ | $9.47 \times 10^{-5}$ | $3.23 \times 10^{-4}$ | $1.08 \times 10^{-4}$ | $6.81 \times 10^{-4}$ | $3.17 \times 10^{-4}$ |                       |
| p,p'-DDE                    | 53.5 | $3.38 \times 10^{-2}$ | $1.41 \times 10^{-2}$ | $1.37 \times 10^{-2}$ | $1.55 \times 10^{-2}$ | $2.75 \times 10^{-2}$ | $1.17 \times 10^{-2}$ | $4.80 \times 10^{-2}$ | $2.91 \times 10^{-2}$ |                       |
| HCB                         | 3    | $5.90 \times 10^{-1}$ | $7.27 \times 10^{-2}$ | $4.94 \times 10^{-3}$ | $4.94 \times 10^{-3}$ | $1.22 \times 10^0$    | $8.63 \times 10^{-3}$ | $1.05 \times 10^0$    | $1.08 \times 10^0$    |                       |
| aldrin                      | 10   | $8.30 \times 10^{-3}$ | $4.23 \times 10^{-3}$ | $1.42 \times 10^{-2}$ | $3.24 \times 10^{-3}$ | $1.74 \times 10^{-2}$ | $9.89 \times 10^{-3}$ | $2.21 \times 10^{-2}$ | $2.13 \times 10^{-2}$ |                       |
| dieldrin                    | 50   | $4.45 \times 10^{-3}$ | $5.34 \times 10^{-4}$ | $4.02 \times 10^{-1}$ | $6.62 \times 10^{-4}$ | $6.45 \times 10^{-3}$ | $1.86 \times 10^{-3}$ | $6.83 \times 10^{-3}$ | $1.25 \times 10^{-3}$ |                       |
| endrin                      | 4.2  | $3.61 \times 10^{-2}$ | $8.63 \times 10^{-3}$ | $7.16 \times 10^{-2}$ | $3.41 \times 10^{-2}$ | $6.01 \times 10^{-2}$ | $2.26 \times 10^{-2}$ | $1.25 \times 10^{-1}$ | $1.88 \times 10^{-2}$ |                       |
| endrin aldehyde             | 42   | $8.52 \times 10^{-3}$ | $1.51 \times 10^{-3}$ | $1.87 \times 10^{-3}$ | $6.52 \times 10^{-4}$ | $2.34 \times 10^{-3}$ | $2.24 \times 10^{-3}$ | $7.41 \times 10^{-3}$ | $5.09 \times 10^{-3}$ |                       |
| endrin ketone               | 42   | $8.98 \times 10^{-4}$ | $2.15 \times 10^{-3}$ | $7.32 \times 10^{-3}$ | $1.45 \times 10^{-3}$ | $1.06 \times 10^{-2}$ | $1.52 \times 10^{-3}$ | $3.52 \times 10^{-3}$ | $1.52 \times 10^{-3}$ |                       |
| endosulfan I                | 2    | $2.47 \times 10^{-1}$ | $1.32 \times 10^{-1}$ | $3.39 \times 10^0$    | $2.08 \times 10^{-2}$ | $1.06 \times 10^{-1}$ | $2.59 \times 10^{-2}$ | $7.80 \times 10^{-2}$ | $6.24 \times 10^{-2}$ |                       |
| endosulfan II               | 4.9  | $7.44 \times 10^{-2}$ | $9.70 \times 10^{-3}$ | $4.67 \times 10^{-1}$ | $1.01 \times 10^{-2}$ | $5.64 \times 10^{-3}$ | $2.73 \times 10^{-3}$ | $9.20 \times 10^{-3}$ | $1.32 \times 10^{-1}$ |                       |
| endosulfan sulfate          | 20   | $6.63 \times 10^{-4}$ | $6.33 \times 10^{-4}$ | $8.95 \times 10^{-3}$ | $2.99 \times 10^{-3}$ | $1.14 \times 10^{-2}$ | $7.39 \times 10^{-5}$ | $3.11 \times 10^{-3}$ | $1.05 \times 10^{-3}$ |                       |
| cis-Chlordane               | 90   | $8.52 \times 10^{-4}$ | $5.47 \times 10^{-5}$ | $1.76 \times 10^{-3}$ | $1.11 \times 10^{-5}$ | $1.54 \times 10^{-5}$ | $1.31 \times 10^{-4}$ | $9.38 \times 10^{-4}$ | $8.67 \times 10^{-4}$ |                       |
| trans-Chlordane             | 12   | $2.94 \times 10^{-3}$ | $2.76 \times 10^{-3}$ | $8.27 \times 10^{-4}$ | $5.01 \times 10^{-4}$ | $2.44 \times 10^{-3}$ | $7.59 \times 10^{-4}$ | $1.41 \times 10^{-2}$ | $6.49 \times 10^{-3}$ |                       |
| heptachlor                  | 38.1 | $3.92 \times 10^{-4}$ | $1.15 \times 10^{-4}$ | $2.88 \times 10^{-3}$ | $1.29 \times 10^{-4}$ | $3.34 \times 10^{-4}$ | $3.35 \times 10^{-4}$ | $3.87 \times 10^{-4}$ | $9.71 \times 10^{-5}$ |                       |
| heptachlor epoxide isomer B | 84   | $5.22 \times 10^{-4}$ | $2.46 \times 10^{-4}$ | $3.18 \times 10^{-5}$ | $6.08 \times 10^{-5}$ | $3.46 \times 10^{-5}$ | $1.33 \times 10^{-4}$ | $1.02 \times 10^{-4}$ | $7.75 \times 10^{-4}$ |                       |
| methoxychlor                | 150  | $1.62 \times 10^{-4}$ | $1.12 \times 10^{-4}$ | $1.17 \times 10^{-4}$ | $7.31 \times 10^{-5}$ | $6.78 \times 10^{-4}$ | $3.82 \times 10^{-5}$ | $1.16 \times 10^{-4}$ | $1.61 \times 10^{-4}$ |                       |
| mirex                       | 1000 | $9.67 \times 10^{-6}$ | $8.55 \times 10^{-7}$ | $1.01 \times 10^{-5}$ | $1.24 \times 10^{-6}$ | $2.15 \times 10^{-6}$ | $2.30 \times 10^{-6}$ | $4.11 \times 10^{-6}$ | $5.68 \times 10^{-6}$ |                       |
| ΣOCPs                       |      | $1.03 \times 10^0$    | $2.82 \times 10^{-1}$ | $4.54 \times 10^0$    | $1.16 \times 10^{-1}$ | $1.49 \times 10^0$    | $1.22 \times 10^{-1}$ | $1.39 \times 10^0$    | $1.38 \times 10^0$    |                       |
